# Supplementary material for: Exploring the Valorization of Buckwheat Waste: A Two-Stage Thermo-Chemical Process for the Production of Saccharides and Biochar
Source: MDPI journal article supplement (doi:10.3390/fermentation8110573), 2022-10-22
Supplement: s1 [file s1]

Archive with 1 entries (1 files):
- fermentation-1986718-supplementary.pdf
