# Supplementary material for: Exploring the Valorization of Buckwheat Waste: A Two-Stage Thermo-Chemical Process for the Production of Saccharides and Biochar
Source: MDPI journal article supplement (doi:10.3390/fermentation8110573), 2022-10-22
Supplement: s1 [file s1 › fermentation-1986718-supplementary.pdf]

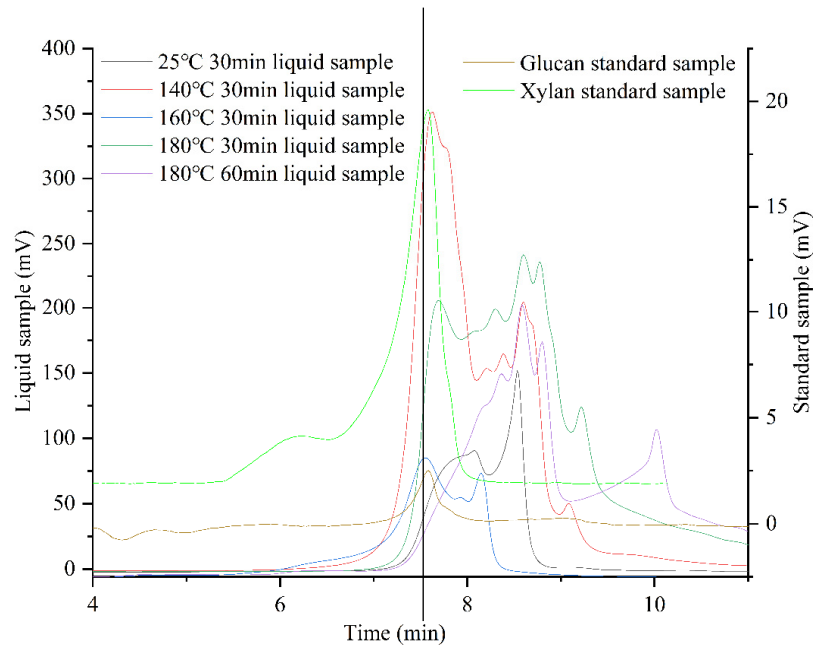

**Figure S1.** HPLC chart for glucan and xylan analysis of standard and liquid sample.

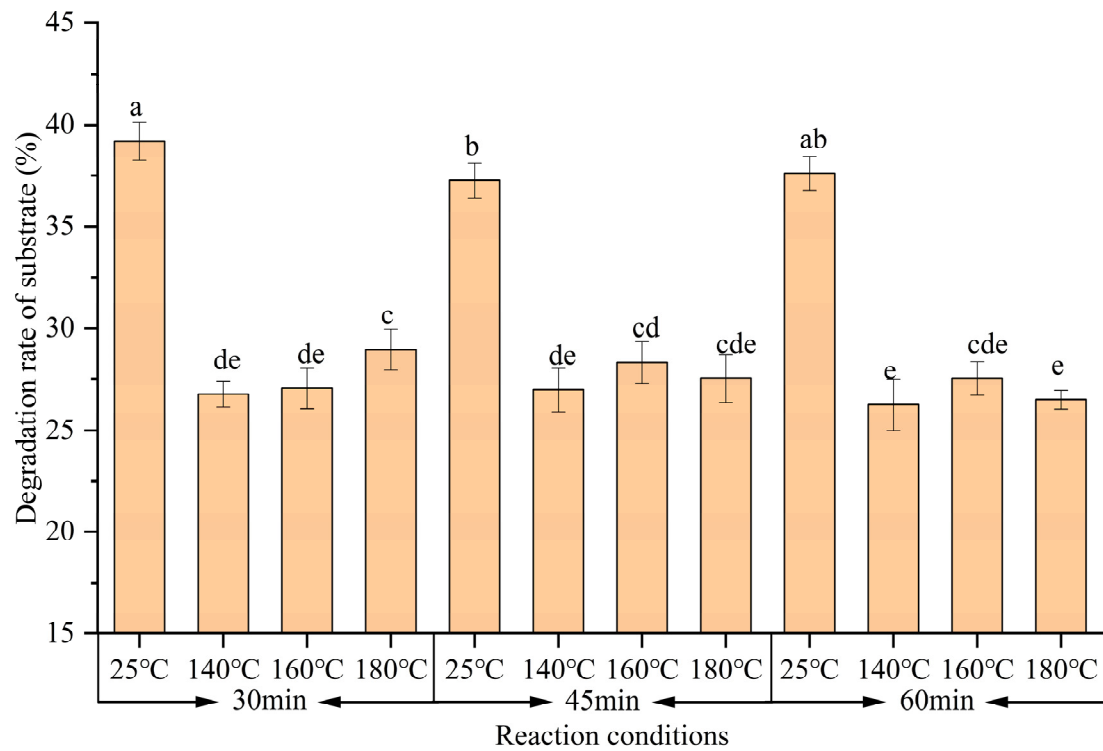

**Figure S2.** Effect of HTE conditions on the percentage degradation of the substrate after enzymatic hydrolysis for 48 h. The alphabets on the bar graph indicate statistical difference ( $P < 0.05$ ).

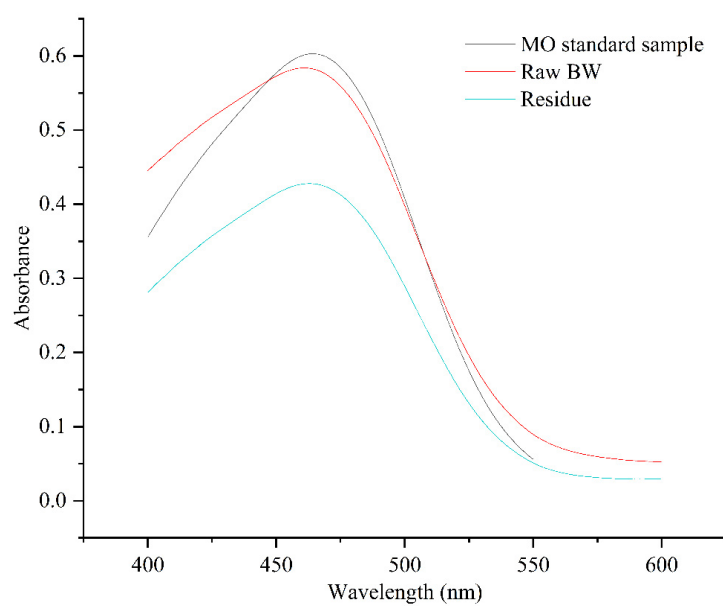

**Figure S3.** VIS absorption spectra of MO standard sample and raw BW as well as residue (160°C, 30min).
